# Supplementary material
Source: Springer Nature journal article supplement (https://www.springermedizin.de/resource/supplementary/12875_2006_196_MOESM1_ESM.pdf/9436490)

# The Consort Flowchart

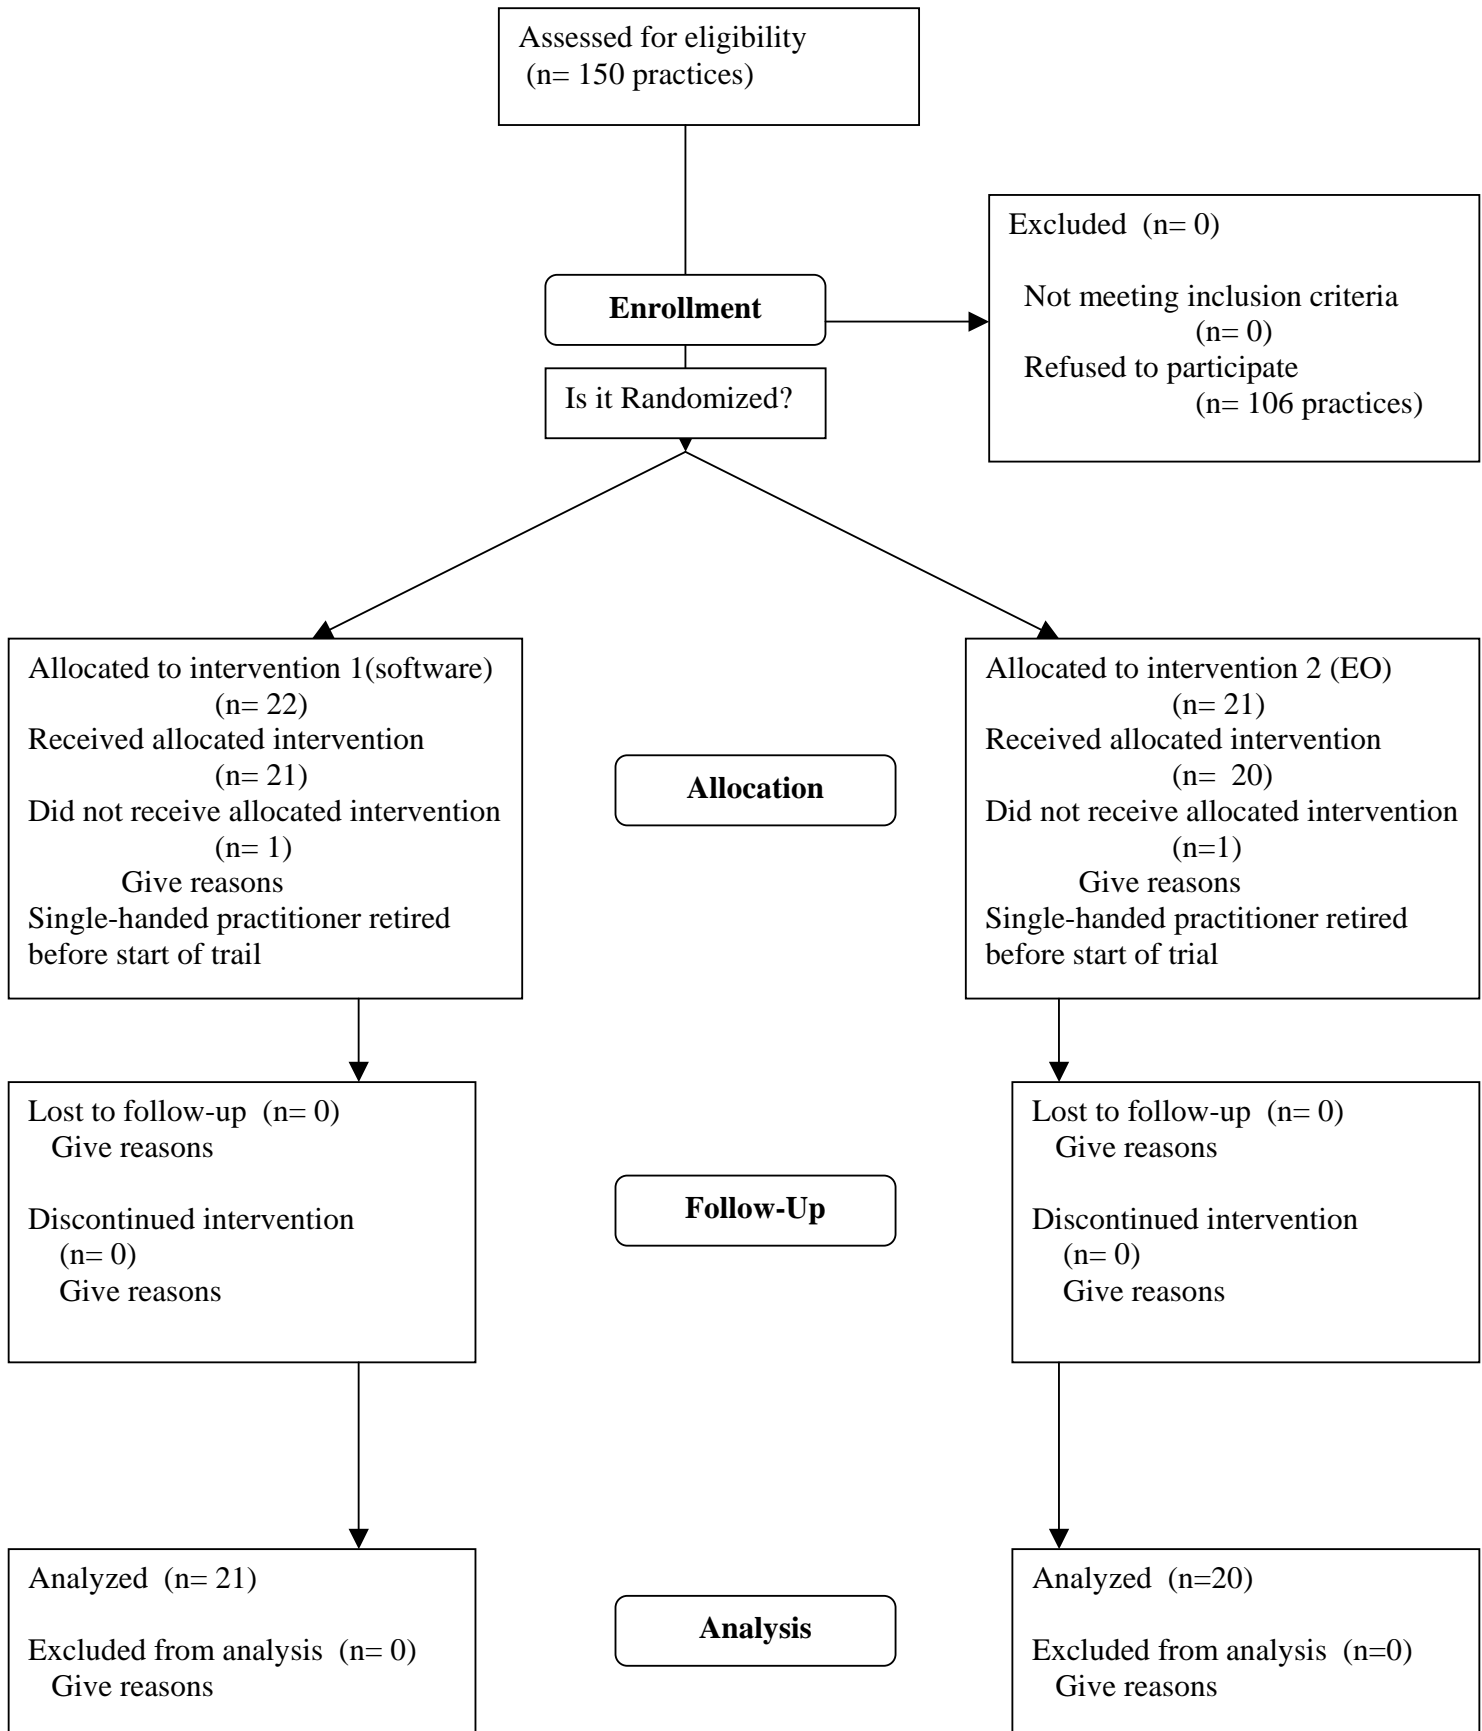

Supplement: MOESM1 [file 9436490]
